# Supplementary material for: Polymeric Nanocapsules Containing Fennel Essential Oil: Their Preparation, Physicochemical Characterization, Stability over Time and in Simulated Gastrointestinal Conditions
Source: MDPI journal article supplement (doi:10.3390/pharmaceutics14040873), 2022-04-16
Supplement: s1 [file s1]

# Supplementary Materials: Polymeric Nanocapsules Containing Fennel Essential Oil: Their Preparation, Physicochemical Characterization, Stability over Time and in Simulated Gastrointestinal Conditions

Giuseppe Granata, Carla Riccobene, Edoardo Napoli and Corrada Geraci

## Sample Treating before HPLC Injection for Digest Analysis

After simulated gastric digestion: 1) To determine the total *trans*-anethole amount, 500  $\mu\text{L}$  of acetonitrile was added to 500  $\mu\text{L}$  of (neutral) gastric digest. The mixture, after vortexing, was centrifuged (10 min at  $10000 \times g$ ), and, then, 200  $\mu\text{L}$  of the supernatant was diluted with 800  $\mu\text{L}$  of acetonitrile before HPLC injection. 2) To determine the free *trans*-anethole, the sample was centrifuged at  $21,00 \times g$  as previously depicted in paragraph 2.4.2., and then 500  $\mu\text{L}$  of supernatant was treated as above described for the total amount. The encapsulated *trans*-anethole amount was obtained by difference (total – free).

After simulated digestion (gastric + intestinal): 500  $\mu\text{L}$  of EtOH was added to 500  $\mu\text{L}$  of the methanol-treated supernatant. The mixture, after vortexing, was centrifuged (10 min at  $10,000 \times g$ ), then, 400  $\mu\text{L}$  of the supernatant was diluted with 600  $\mu\text{L}$  of acetonitrile, and, after centrifugation (5 min at  $3500 \times g$ ) an aliquot of this mixture was injected in HPLC.

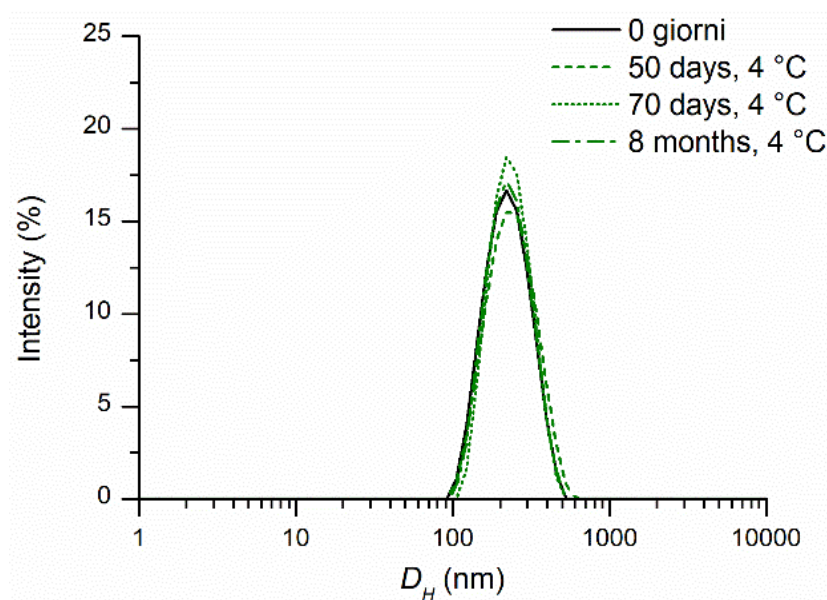

**Figure S1.** Intensity weighted particle  $D_H$  (nm) distribution of FEO-NCs: freshly prepared suspension, stored for 50 days, 70 days, and 8 months at 4 °C.

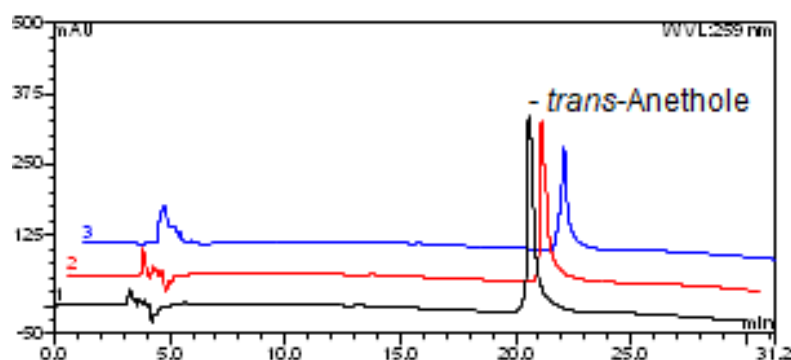

**Figure S2.** Offset HPLC chromatograms showing the peak (time retention 20.6 min) of the FEO main component (*trans*-anethole) in in vitro simulated digestion experiment: black line sample before the digestion; red line sample after gastric digestion; blue line sample after intestinal digestion.

**Table S1.** Stability over time of fennel essential oil-loaded nanocapsules (FEO-NCs) at 4 °C.

| FEO-NCs                   | Storage Time (days)      |                            |                          |                            |                            |
|---------------------------|--------------------------|----------------------------|--------------------------|----------------------------|----------------------------|
|                           | 0                        | 7                          | 15                       | 21                         | 30                         |
| Z-average (nm)            | 210 ± 3 <sup>a</sup>     | 225 ± 4 <sup>b</sup>       | 222 ± 4 <sup>b</sup>     | 220 ± 3 <sup>b</sup>       | 223 ± 6 <sup>b</sup>       |
| PDI                       | 0.10 ± 0.04 <sup>a</sup> | 0.09 ± 0.03 <sup>a,b</sup> | 0.04 ± 0.02 <sup>b</sup> | 0.08 ± 0.03 <sup>a,b</sup> | 0.07 ± 0.03 <sup>a,b</sup> |
| ζ (mV)                    | -15 ± 2 <sup>a</sup>     | -15 ± 1 <sup>a</sup>       | -13 ± 1 <sup>a</sup>     | -14 ± 2 <sup>a</sup>       | -15 ± 4 <sup>a</sup>       |
| FEO loaded amount (mg/mL) | 5.0 ± 0.1 <sup>a</sup>   | 4.8 ± 0.1 <sup>a,b</sup>   | 4.6 ± 0.1 <sup>b,c</sup> | 4.6 ± 0.1 <sup>b,c</sup>   | 4.5 ± 0.1 <sup>c</sup>     |

Values in the same line with the same superscripts are not significantly different ( $p > 0.05$ ).

**Table S2.** Stability over time of fennel essential oil-loaded nanocapsules (FEO-NCs) at 40 °C.

| FEO-NCs                   | Storage Time (days)      |                          |                          |                          |                          |
|---------------------------|--------------------------|--------------------------|--------------------------|--------------------------|--------------------------|
|                           | 0                        | 7                        | 15                       | 21                       | 30                       |
| Z-average (nm)            | 210 ± 3 <sup>a</sup>     | 212 ± 5 <sup>a</sup>     | 210 ± 6 <sup>a</sup>     | 211 ± 2 <sup>a</sup>     | 222 ± 2 <sup>b</sup>     |
| PDI                       | 0.10 ± 0.04 <sup>a</sup> | 0.07 ± 0.03 <sup>a</sup> | 0.09 ± 0.02 <sup>a</sup> | 0.08 ± 0.02 <sup>a</sup> | 0.06 ± 0.04 <sup>a</sup> |
| ζ (mV)                    | -15 ± 2 <sup>a</sup>     | -12 ± 1 <sup>a</sup>     | -16 ± 3 <sup>a</sup>     | -14 ± 2 <sup>a</sup>     | -14 ± 4 <sup>a</sup>     |
| FEO loaded amount (mg/mL) | 5.0 ± 0.1 <sup>a</sup>   | 4.7 ± 0.1 <sup>b</sup>   | 4.6 ± 0.1 <sup>b</sup>   | 4.5 ± 0.1 <sup>b</sup>   | 4.2 ± 0.2 <sup>c</sup>   |

Values in the same line with the same superscripts are not significantly different ( $p > 0.05$ ).

**Table S3.** Fennel essential oil composition over time of FEO-loaded nanocapsules at 4 °C \*.

| FEO Component (%) | Storage Time (days)         |                           |                            |                             |                            |
|-------------------|-----------------------------|---------------------------|----------------------------|-----------------------------|----------------------------|
|                   | 0                           | 7                         | 15                         | 21                          | 30                         |
| limonene          | 0.37 ± 0.03 <sup>a</sup>    | 0.42 ± 0.07 <sup>a</sup>  | 0.36 ± 0.03 <sup>a,b</sup> | 0.29 ± 0.04 <sup>b</sup>    | 0.34 ± 0.05 <sup>a,b</sup> |
| fenchone          | 0.63 ± 0.05 <sup>a,b</sup>  | 0.62 ± 0.04 <sup>a</sup>  | 0.84 ± 0.06 <sup>c</sup>   | 0.72 ± 0.05 <sup>b</sup>    | 0.90 ± 0.07 <sup>c</sup>   |
| methyl chavicol   | 0.40 ± 0.01 <sup>a</sup>    | 0.40 ± 0.01 <sup>a</sup>  | 0.45 ± 0.02 <sup>b</sup>   | 0.44 ± 0.02 <sup>b</sup>    | 0.44 ± 0.02 <sup>b</sup>   |
| p-anisaldehyde    | 0.41 ± 0.02 <sup>a</sup>    | 0.37 ± 0.01 <sup>a</sup>  | 0.69 ± 0.18 <sup>b</sup>   | 0.64 ± 0.13 <sup>b</sup>    | 0.90 ± 0.10 <sup>c</sup>   |
| cis-anethole      | 0.22 ± 0.07 <sup>a,b</sup>  | 0.70 ± 0.13 <sup>c</sup>  | 0.35 ± 0.06 <sup>a</sup>   | 0.35 ± 0.13 <sup>a</sup>    | 0.10 ± 0.06 <sup>b</sup>   |
| trans-anethole    | 94.93 ± 0.23 <sup>a,b</sup> | 94.20 ± 0.26 <sup>a</sup> | 96.24 ± 0.58 <sup>c</sup>  | 95.90 ± 1.19 <sup>b,c</sup> | 96.04 ± 0.36 <sup>c</sup>  |

\* Components in percentages lower than 0.2 were not considered. Values in the same line with the same superscripts are not significantly different ( $p > 0.05$ ).

**Table S4.** Fennel essential oil composition over time of FEO-loaded nanocapsules at 40 °C \*.

| FEO Component<br>(%) | Storage Time (days)       |                           |                           |                            |                             |
|----------------------|---------------------------|---------------------------|---------------------------|----------------------------|-----------------------------|
|                      | 0                         | 7                         | 15                        | 21                         | 30                          |
| limonene             | 0.42 ± 0.06 <sup>a</sup>  | 0.45 ± 0.06 <sup>a</sup>  | 0.28 ± 0.09 <sup>b</sup>  | 0.34 ± 0.07 <sup>a,b</sup> | 0.38 ± 0.06 <sup>a,b</sup>  |
| fenchone             | 0.65 ± 0.04 <sup>a</sup>  | 0.67 ± 0.06 <sup>a</sup>  | 0.98 ± 0.03 <sup>b</sup>  | 0.72 ± 0.07 <sup>a</sup>   | 0.96 ± 0.06 <sup>b</sup>    |
| methyl chavicol      | 0.40 ± 0.01 <sup>a</sup>  | 0.42 ± 0.01 <sup>a</sup>  | 0.45 ± 0.01 <sup>b</sup>  | 0.45 ± 0.01 <sup>b,c</sup> | 0.47 ± 0.01 <sup>c</sup>    |
| p-anisaldehyde       | 0.39 ± 0.02 <sup>a</sup>  | 0.48 ± 0.02 <sup>a</sup>  | 1.15 ± 0.11 <sup>b</sup>  | 0.87 ± 0.07 <sup>c</sup>   | 1.29 ± 0.13 <sup>b</sup>    |
| cis-anethole         | 0.34 ± 0.11 <sup>a</sup>  | 0.56 ± 0.09 <sup>a</sup>  | 0.44 ± 0.17 <sup>b</sup>  | 0.51 ± 0.18 <sup>a</sup>   | 0.07 ± 0.03 <sup>b</sup>    |
| trans-anethole       | 94.66 ± 0.32 <sup>a</sup> | 93.82 ± 0.53 <sup>b</sup> | 95.02 ± 0.72 <sup>a</sup> | 95.80 ± 0.15 <sup>c</sup>  | 95.35 ± 0.21 <sup>a,c</sup> |

\* Components in percentages lower than 0.2 were not considered. Values in the same line with the same superscripts are not significantly different ( $p > 0.05$ ).
